# Supplementary material for: Tipping points in ocean and atmosphere circulations
Source: Copernicus journal article supplement (doi:10.5194/egusphere-2023-2589), 2023-12-11
Supplement: Supplementary file 1 [file egusphere-2023-2589-supplement.pdf]

**A** MLD in Winter 2020-30

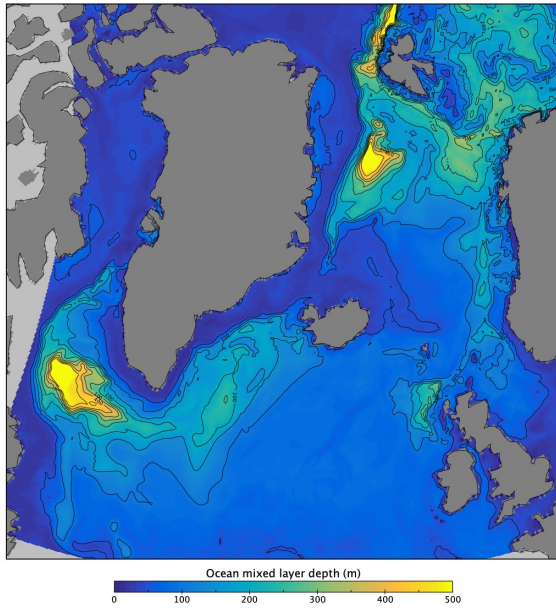

**B** Projected MLD change by winter 2040-50

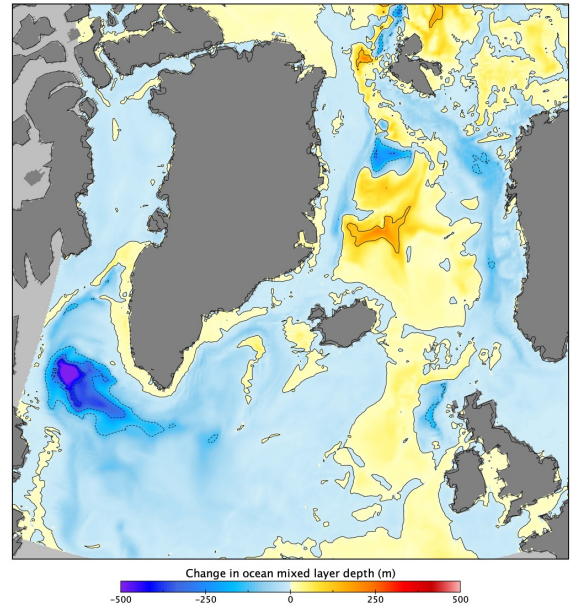

**C** SST in winter 2020-30

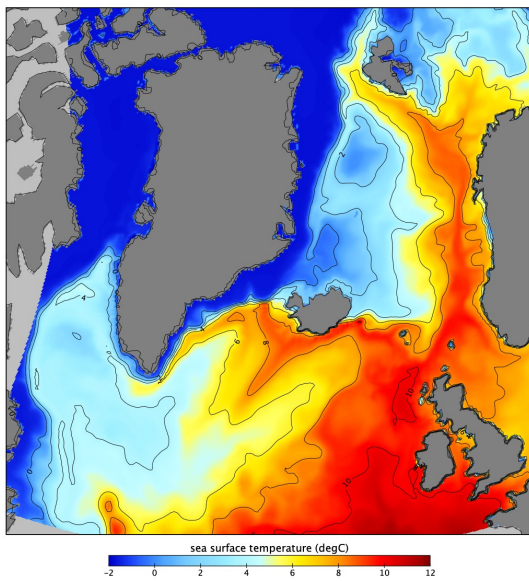

**D** projected SST change by winter 2040-50

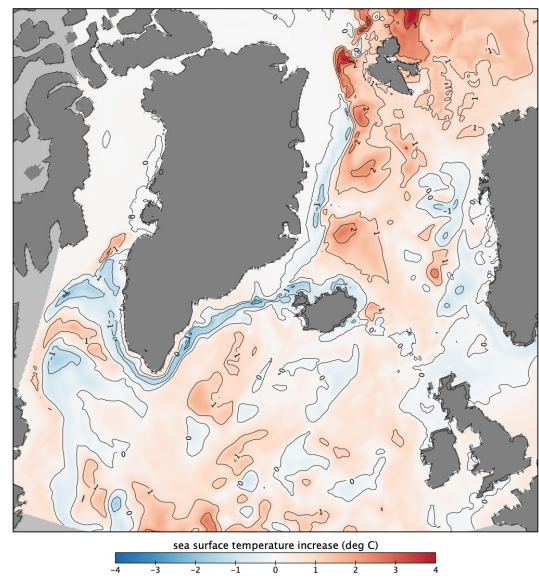

**E** SST in summer 2020-30

**F** Projected SST change by summer 2040-50

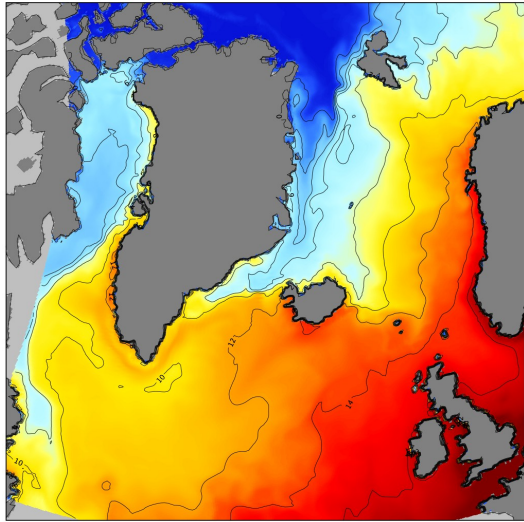

sea surface temperature (degC)  
-2 0 2 4 6 8 10 12 14 16 18

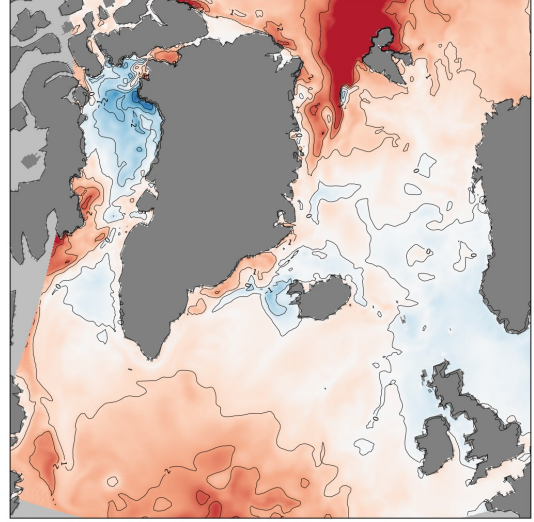

sea surface temperature increase (deg C)  
-4 -3 -2 -1 0 1 2 3 4

**G** Precipitation in winter 2020-30

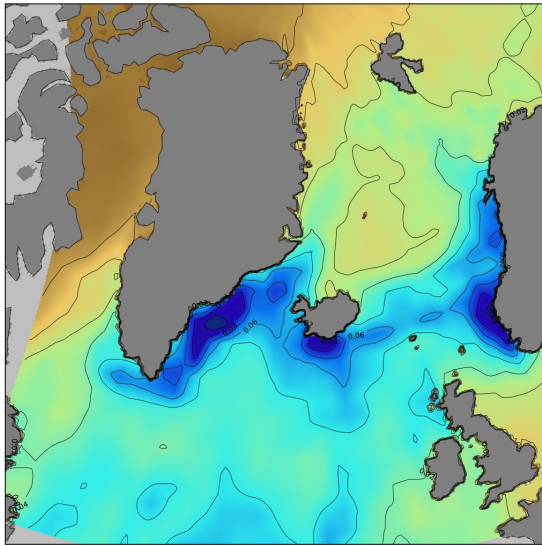

Total precipitation ( $10^{-3} \text{ kg/m}^2/\text{s}$ )  
0.00 0.02 0.04 0.06 0.08 0.10

**H** Projected precipitation change by winter 2040-50

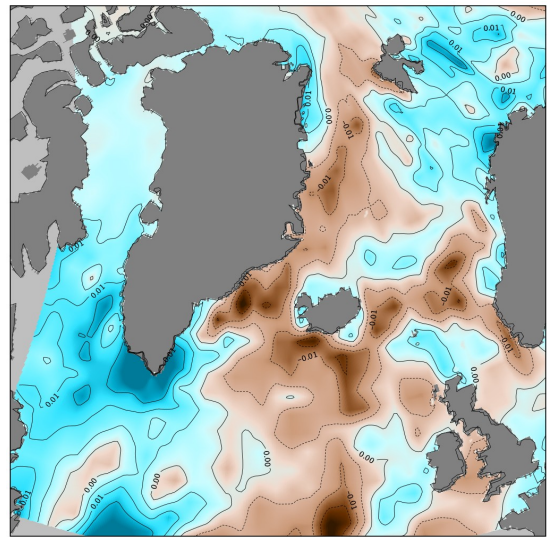

Total precipitation change ( $10^{-3} \text{ kg/m}^2/\text{s}$ )  
-0.02 -0.01 0.00 0.01 0.02

I Precipitation in summer 2020-30

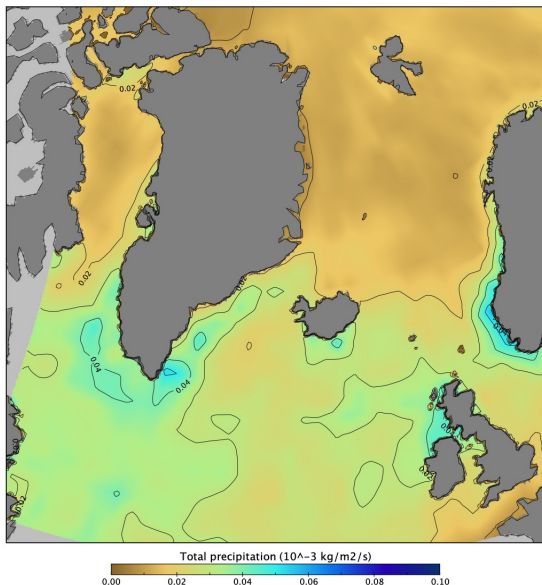

J Projected precipitation change by summer 2040-50

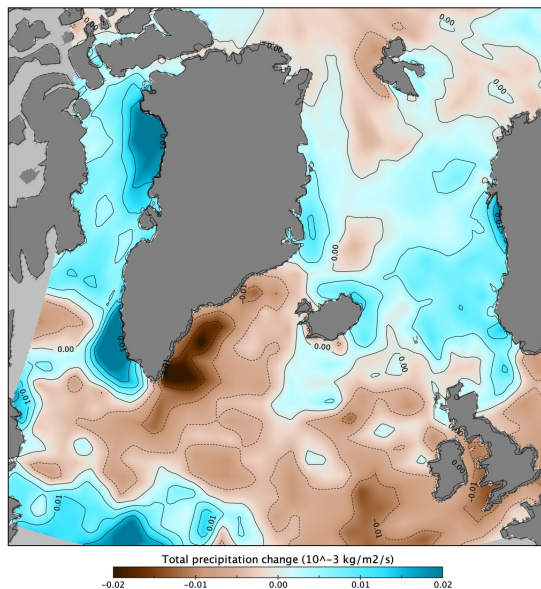

5 **Figure S11. Additional analysis of SPG. A** in winter 2020-30 (January-March) and **B** changes in the projected ocean mixed layer depth (MLD) by winter 2040-50. **C** and **D** - the same as above but for sea surface temperature (SST) and **E** and **F** for SST in summer (June-August); **G-I** are the same as above but for total atmospheric precipitation. NEMO-MEDUSA 1/4 degree high resolution model results using ssp370 CMIP6 scenario 2015-2099. High-resolution simulations are courtesy of Drs Andrew Coward, Andrew Yool, Katya Popova and Stephen Kelly, NOC.

10
